# Supplementary material for: Structure-based Mechanistic Insights into Terminal Amide Synthase in Nosiheptide-Represented Thiopeptides Biosynthesis
Source: PubMed Central journal article supplement (PMC4525488; doi:10.1038/srep12744), 2015-08-05

# Structure-based Mechanistic Insights into Terminal Amide Synthase in Nosiheptide- Represented Thiopeptides Biosynthesis

Shanshan Liu<sup>1</sup>, Heng Guo<sup>1,+</sup>, Tianlong Zhang<sup>2,+</sup>, Li Han<sup>1,+</sup>, Pengfei Yao<sup>1,+</sup>, Yan  
Zhang<sup>1</sup>, Naiyan Rong<sup>1</sup>, Yi Yu<sup>1</sup>, Wenxian Lan<sup>1</sup>, Chunxi Wang<sup>1</sup>, Jianping Ding<sup>2</sup>,  
Renxiao Wang<sup>1</sup>, Wen Liu<sup>1\*</sup>, Chunyang Cao<sup>1\*</sup>

## Supporting materials

**Fig. S1** The stability of full-length NosA and its truncated variants. (A) SDS-PAGE gel running for full-length NosA, lanes from 1 to 6, representing samples kept after 5 days, 10 days, 15 days, 20 days, 25 days and 30 days, respectively; (B) SDS-PAGE gel for NosA<sub>1-140</sub>, lanes 1-2, representing samples taken before and after running the 1<sup>st</sup> Ni<sup>2+</sup> column for purification, respectively; lane 3, representing the fractions collected on the 2<sup>nd</sup> column after digestion by thrombin protease; (C) SDS-PAGE gel for NosA<sub>1-130</sub>, lanes 1-2, representing samples taken before and after running the 1<sup>st</sup> Ni column for purification; (D) SDS-PAGE gel for NosA<sub>1-120</sub>, lanes 1-2, representing samples taken before and after running the 1<sup>st</sup> Ni<sup>2+</sup> column for purification, respectively; lane 3, representing the fractions collected on the 2<sup>nd</sup> Ni<sup>2+</sup> column after digestion by thrombin protease; (E) SDS-PAGE gel for NosA<sub>1-111</sub>, lanes 1-4, representing samples kept after 5 days, 10 days, 15 days and 25 days, respectively. In all SDS\_PAGE gels (A)-(E), lane M means protein marker, where the molecular weights were labeled. Same protein marker was used in running SDS\_PAGE gels (B)-(E).

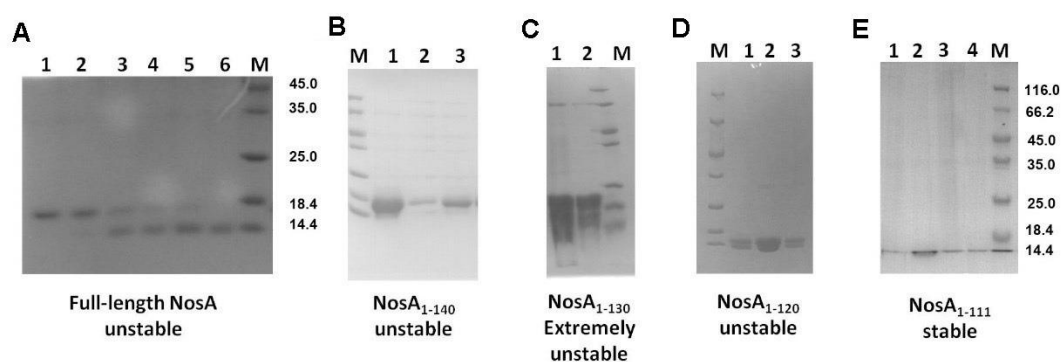

**Fig. S2** The secondary structure of NosA predicted by Jpred 3 sever, where arrows indicate  $\beta$ -sheets, while barrels represents  $\alpha$ -helices. The C-terminus of NosA (residues 106-151) was predicted as a flexible loop.

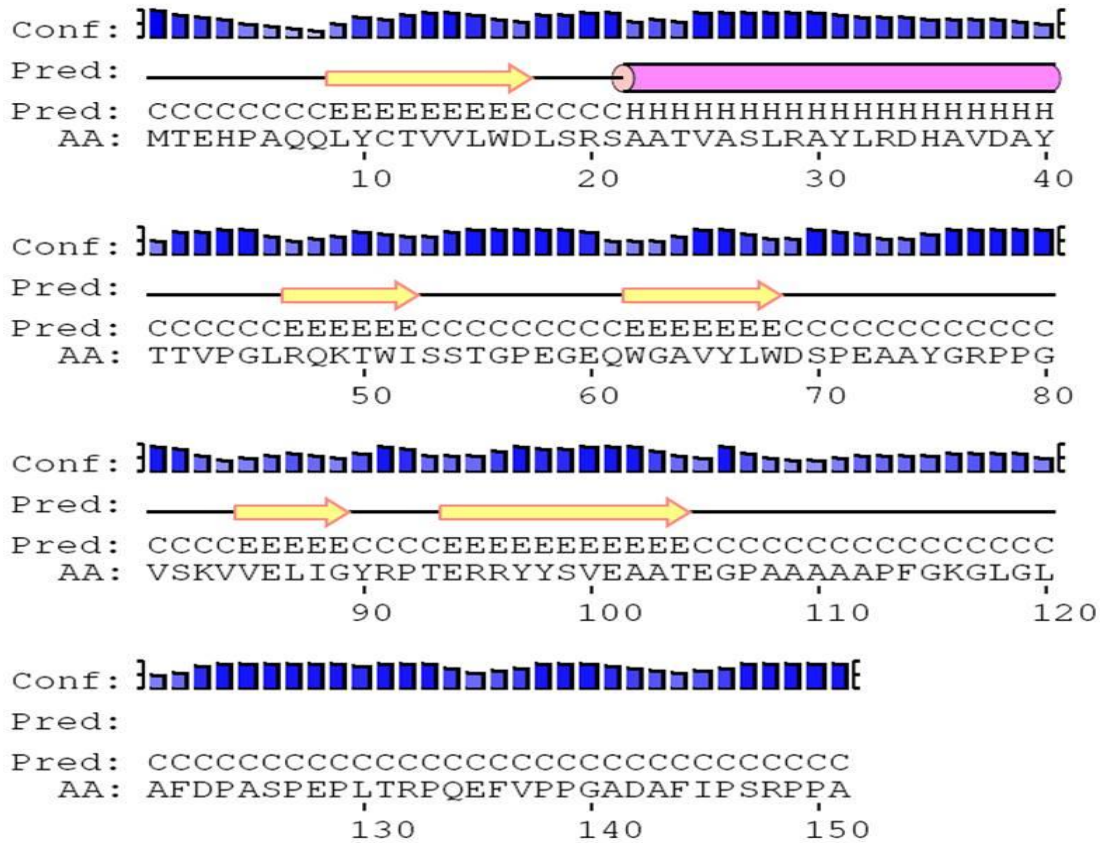

**Fig. S3** The possible substrate binding sites of NosA predicted by comparison to its structural homologs. (A) Ribbon representation of NosA<sub>1-111</sub> with highlighted active sites K49 and E101'. Two monomers were displayed in yellow and blue, respectively. The side-chains of active sites K49 and E101 in one monomer (or K49' and E101' in another monomer) were represented in stick mode. (B) ActVA-Orf6 in complex with NOM, pdb code 1N5V; (C) IsdG in complex with two hemes, pdb code 2ZDO; (D) IsdI in complex with two hemes, pdb code 4FNH; and (E) MhuD in complex with four hemes. From (B) to (E), the ligand NOM or heme was highlighted in red or in pink.

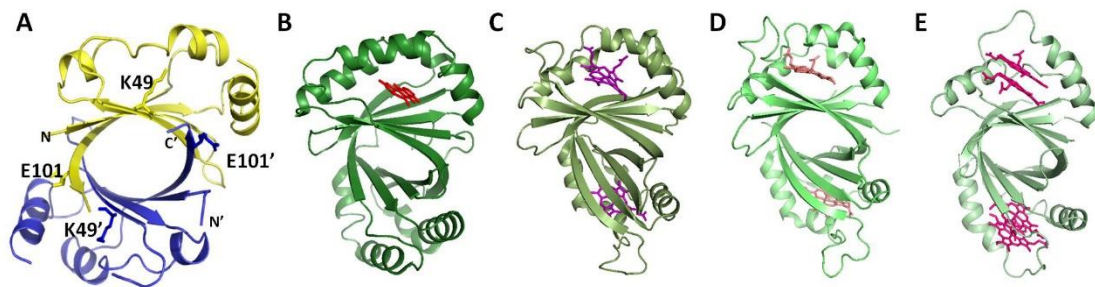

**Fig.S4** Enzymatic assay on the full-length NosA and its variants running on HPLC system. In all cases, the substrate (the upper) and the product nosiheptide (the down) were used as controls, highlighted in a dotted red line and green line, respectively.

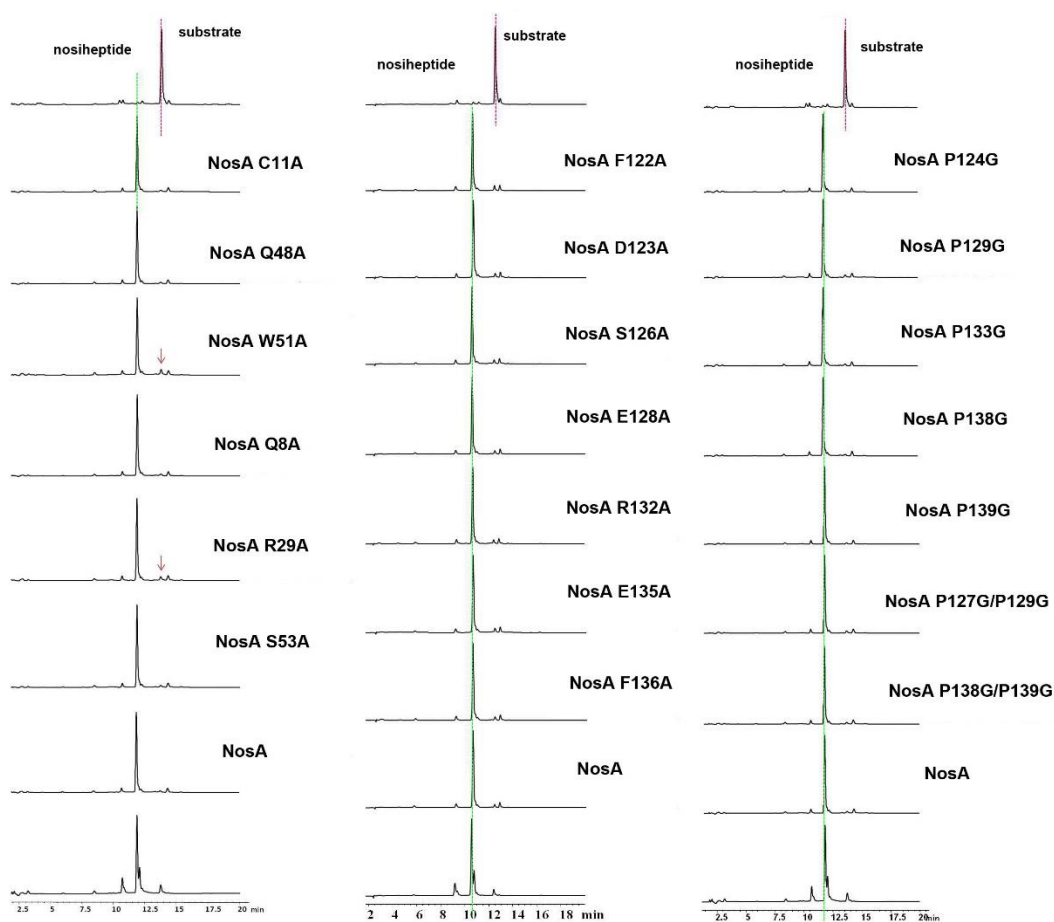

**Figure S5** The distances measurement suggested that NosA may function as a dimer. The distances between the oxygen atoms of the –OH groups (highlighted in blue and red, respectively) and the C $\alpha$ -N bond cleavage site in the substrate (left) were measured as 12Å and 20Å, respectively. The intra-molecular and inter-molecular distances between the oxygen atom in the side-chain of E101 and the nitrogen atom in the side-chains of K49 were measured as 26Å and 13.6Å, respectively. The intra-molecular and inter-molecular distances between the oxygen atom in the side-chain of E101 and the nitrogen atom in the side-chains of K49 were indicated by arrow-lines.

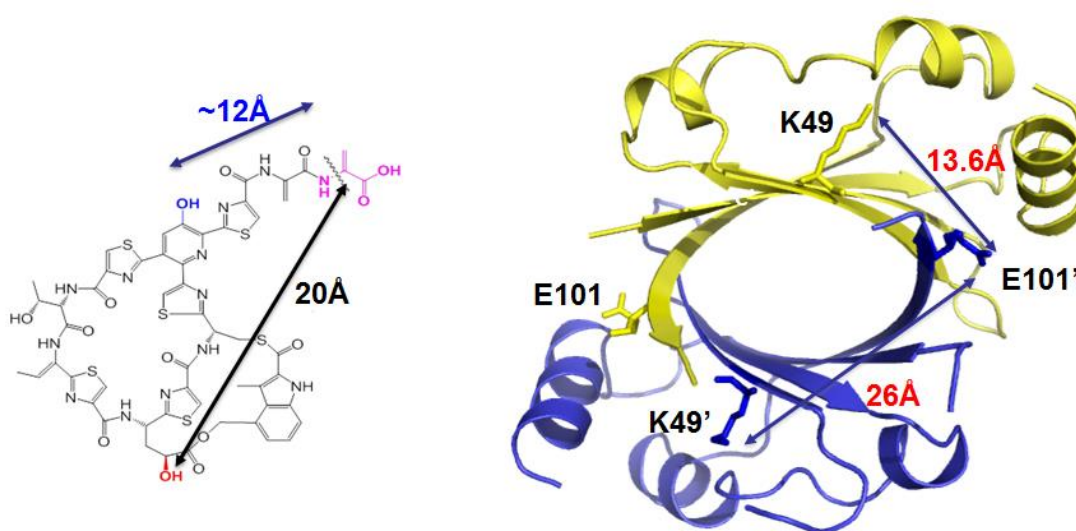

**Fig. S6** The binding affinity of NosA<sub>1-111</sub> to NosA<sub>112-151</sub> measured by ITC assay.

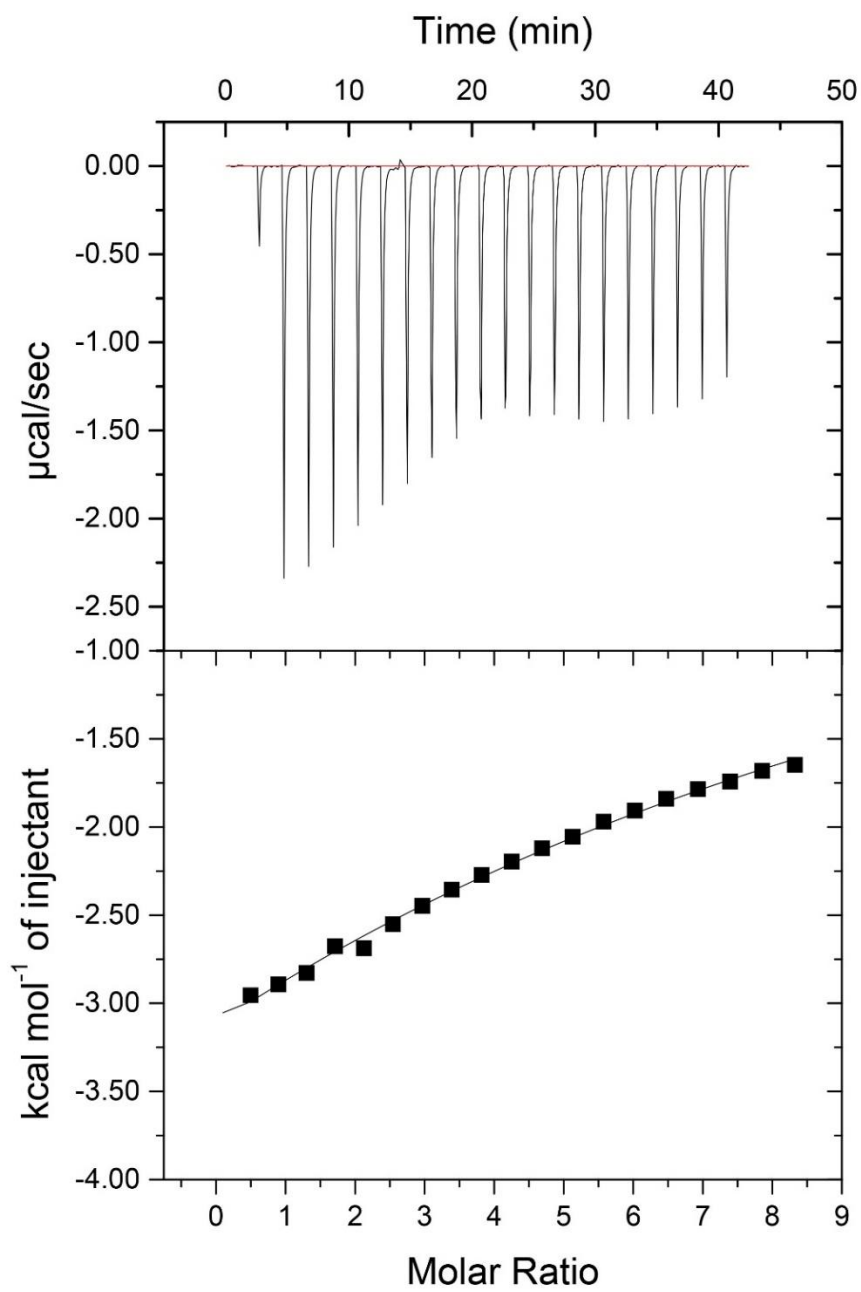

**Fig. S7** NosA<sub>112-151</sub> is in random coil conformers in its free state and in the state of mixing with the N-terminal NosA<sub>1-111</sub> confirmed by (A) running circular dichroism (CD) spectrum of free NosA<sub>112-151</sub>, and (B) by running <sup>1</sup>H-<sup>15</sup>N HSQC spectrum on free NosA<sub>112-151</sub> (pink), overlapped very well with that acquired on the NosA<sub>112-151</sub> in complex with NosA<sub>1-111</sub> (cyan). The concentration of NosA<sub>112-151</sub> was about 0.2 mM in NMR buffer. And the mole ratio (NosA<sub>1-111</sub> vs NosA<sub>112-151</sub>) =1:1.

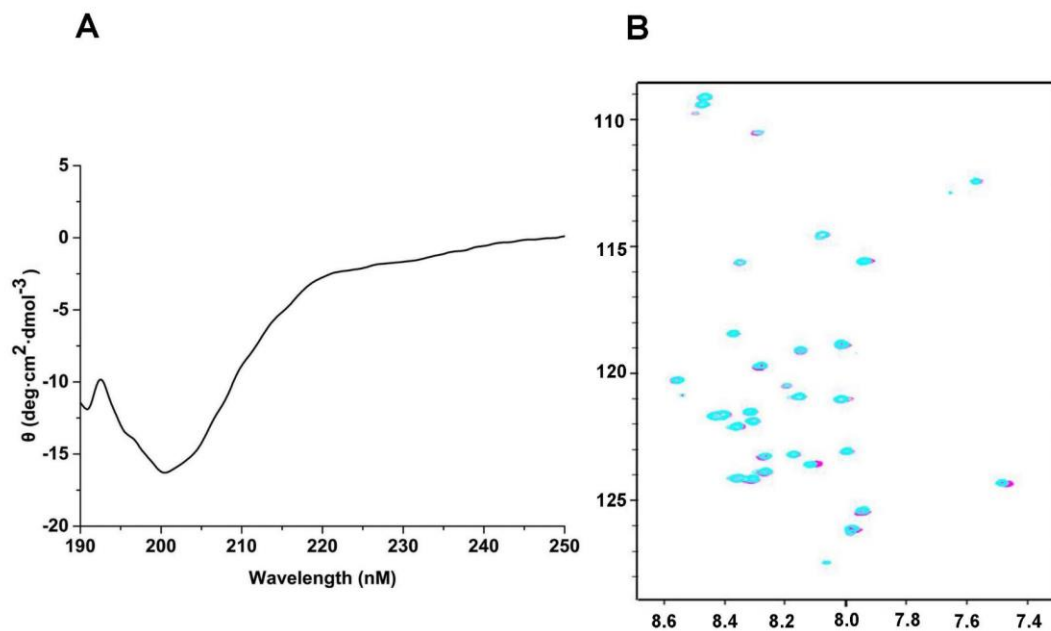

**Fig. S8** Representative snapshots of the MD simulation trajectory. The N-terminal NosA<sub>1-111</sub> was demonstrated in a yellow ribbon mode, while the C-terminal NosA<sub>121-140</sub> fragment (121-140 aa) was displayed in blue ribbon mode. The substrate was highlighted in cyan-stick mode.

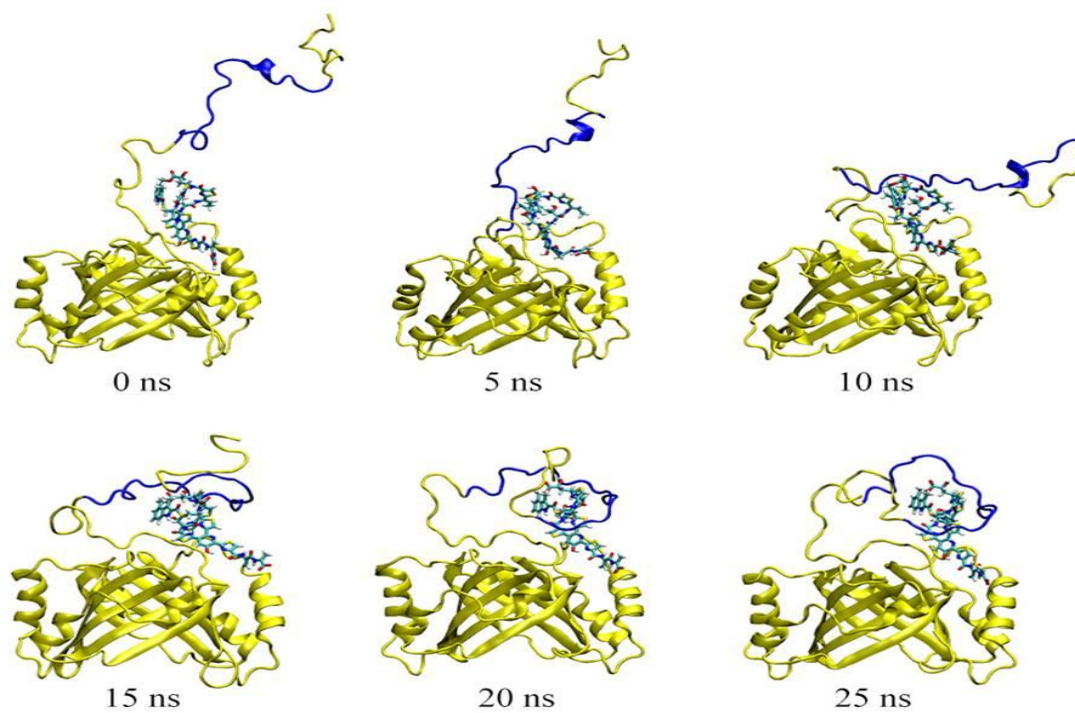

Supplement: srep12744-s1.pdf [file srep12744-s1.pdf]
